# Supplementary material
Source: Springer Nature journal article supplement (https://www.springermedizin.de/resource/supplementary/12985_2007_331_MOESM4_ESM.pdf/9607538)

**A**Anti-M2e(pep-nat), ( $\mu\text{g/ml}$ )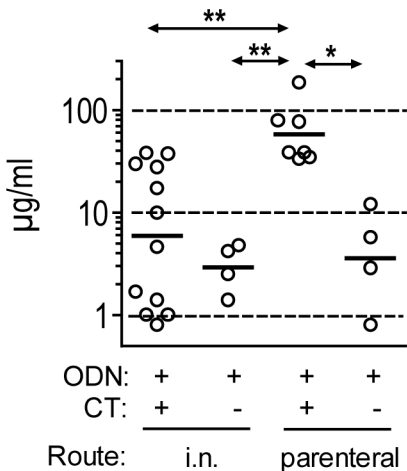**B**

G2a anti-M2e(pep-nat) (%)

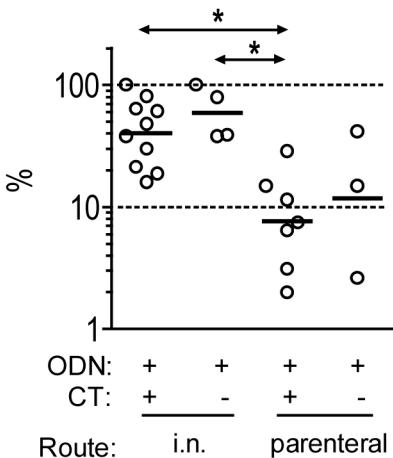

Supplement: MOESM4 [file 9607538]
